# Supplementary material for: DFT study on the mechanism of methanol dehydrogenation over RuxPy surfaces
Source: Royal Society of Chemistry journal article supplement (doi:10.1039/d4cp03025g), 2024-01-01
Supplement: d4cp03025g1.pdf [file d4cp03025g1.pdf]

## Supporting Information (SI)

### DFT Study on the Mechanism of Methanol Dehydrogenation over $\text{Ru}_x\text{P}_y$ Surfaces

Hao Lu,<sup>a</sup> Yuan Zhong,<sup>a</sup> Yao Jie,<sup>a</sup> Pan Yin,<sup>a</sup> Tian-Yao Shen,<sup>a</sup> Jing-Yi Guo,<sup>a</sup> Wei  
Zhang,<sup>a</sup> Min Pu,<sup>a</sup> Hong Yan,<sup>\*a</sup>

<sup>a</sup> *State Key Laboratory of Chemical Resource Engineering, College of Chemistry,  
Beijing University of Chemical Technology, Beijing 100029, China*

\* Corresponding Authors:

[yanhong@mail.buct.edu.cn](mailto:yanhong@mail.buct.edu.cn) (Hong Yan).

## Contents

| Title                                                                                                                                                                                                                                                        | Page   |
|--------------------------------------------------------------------------------------------------------------------------------------------------------------------------------------------------------------------------------------------------------------|--------|
| 1. The structures of Ru, Ru <sub>2</sub> P, RuP, RuP <sub>2</sub> unit cells. (Figure S1)                                                                                                                                                                    | S3     |
| 2. Energy test for <i>K</i> -point. (Table S1)                                                                                                                                                                                                               | S3     |
| 3. Energy test for cut-off energy (ENCUT). (Figure S2)                                                                                                                                                                                                       | S3     |
| 4. Energy test for the energy convergence criterion. (Table S2)                                                                                                                                                                                              | S4     |
| 5. Adsorption information for MD reaction intermediates on Ru(0001), Ru <sub>2</sub> P(210), RuP(112), and RuP <sub>2</sub> (110). (Table S3-6)                                                                                                              | S4-7   |
| 6. Top view of all the initial states (IS), the corresponding transition states (TS) and final states (FS) on Ru(0001), Ru <sub>2</sub> P(210), RuP(112), and RuP <sub>2</sub> (110), along with the adsorption energies ( $E_{\text{ads}}$ ). (Figure S3-6) | S7-10  |
| 7. Screening of methanol adsorption sites on Ru(0001), Ru <sub>2</sub> P(210), RuP(112), and RuP <sub>2</sub> (110) surfaces (Figure S7)                                                                                                                     | S10    |
| 8. Reaction energy barriers for pathway 1-4 on Ru(0001), Ru <sub>2</sub> P(210), RuP(112), and RuP <sub>2</sub> (110). (Figure S8-12)                                                                                                                        | S11-13 |
| 9. Reaction free energy barriers for pathway 1-4 on Ru(0001), Ru <sub>2</sub> P(210), RuP(112), and RuP <sub>2</sub> (110). (Figure S13-16)                                                                                                                  | S13-15 |
| 10. The states of TDTS and TDI, the energies of TDTS and TDI, and the calculated $E_{\text{a}}^{\text{eff}}$ of MD over the surfaces of Ru(0001), Ru <sub>2</sub> P(210), RuP(112), and RuP <sub>2</sub> (110). (Table S7)                                   | S15    |
| 11. Comparison of previous DFT calculations works on the mechanism of MD reaction over metal-based catalysts (without support). (Table S8)                                                                                                                   | S15-16 |

## 1. The structures of Ru, Ru<sub>2</sub>P, RuP, RuP<sub>2</sub> unit cells.

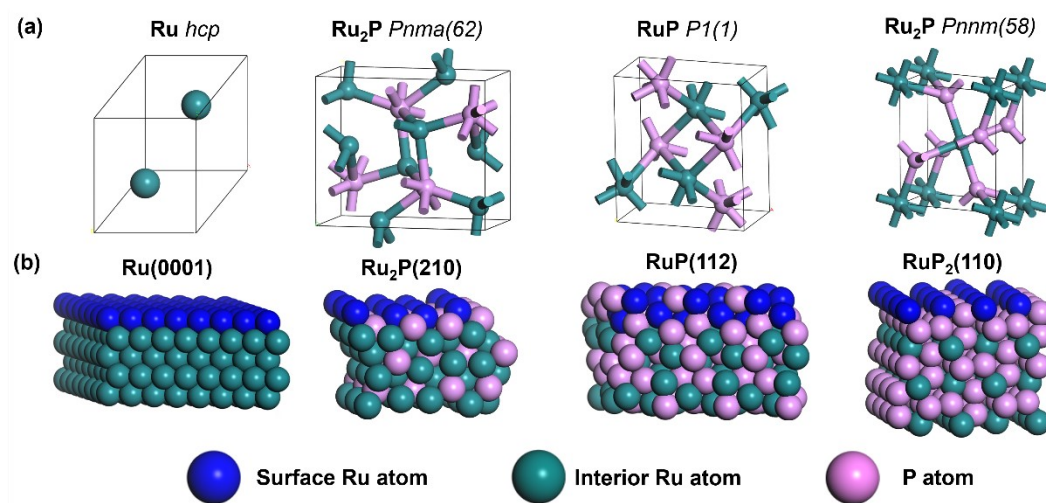

**Figure S1.** (a) Structure model of Cells. (b) Structures of Ru(0001), Ru<sub>2</sub>P(210), RuP(112), and RuP<sub>2</sub>(110).

## 2. Energy test for K-point.

As shown in Table S1, when the K-point is set to  $3 \times 3 \times 1$ , the adsorption energy (The test site is not the optimal adsorption site) is -0.565 eV, and when the K-point is increased to  $5 \times 5 \times 1$ , the DFT calculation results show that the adsorption energy has only a small change (0.001 eV). Therefore, in order to save computing resources, the K-point of  $3 \times 3 \times 1$  is used to complete all calculations.

**Table S1.** Adsorption energy of Propane molecules on RuP(112) surface when K-point are  $3 \times 3 \times 1$  and  $5 \times 5 \times 1$  (in eV).

| K-pont                | $E_{\text{surface}}$ | $E_{\text{adsorbate}}$ | $E_{\text{adsorbate/surface}}$ | $E_{\text{ads}}$ |
|-----------------------|----------------------|------------------------|--------------------------------|------------------|
| $3 \times 3 \times 1$ | -229.549             | -57.012                | -287.126                       | -0.565           |
| $5 \times 5 \times 1$ | -229.549             | -57.012                | -287.127                       | -0.566           |

## 3. Energy test for cut-off energy (ENCUT).

In order to make reasonable use of computing resources, we tested the cutoff energy (ENCUT) required for the calculation. If the ENCUT value is too small, the

system will be difficult to converge, and if it is too large, it will take longer to waste computing resources. As shown in Figure S2, for the system we want to study, when the ENCUT value is 450 eV, it can not only ensure the convergence of the system, but also save computing resources.

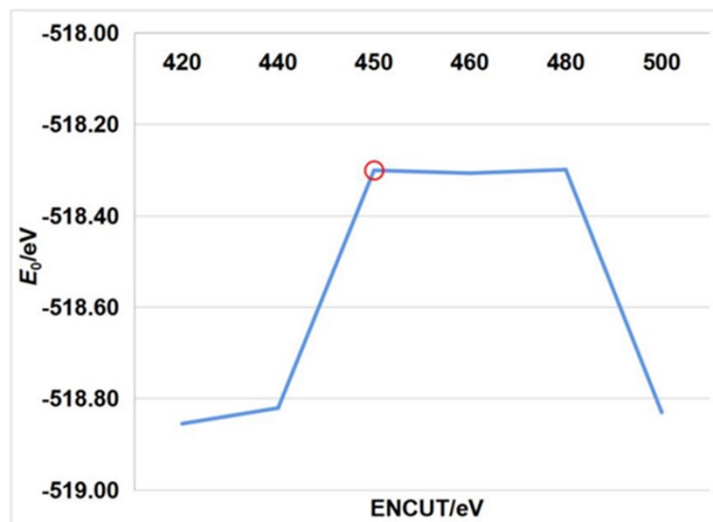

**Figure S2.** Take the energy  $E_0$  of CH<sub>3</sub>OH adsorbed on RuP(112) surface as an example for ENCUT test.

## 2. Energy test for the energy convergence criterion.

As shown in Table S2, when the energy convergence criterion is set to 0.05 eV/Å, the adsorption energy is -0.6185 eV, and when the energy convergence criterion is decreased to 0.02 eV/Å, the DFT calculation results show that the adsorption energy has only a small change (0.0012 eV). Therefore, in order to save computing resources, the energy convergence criterion of 0.05 eV/Å is used to complete all calculations.

**Table S2.** Adsorption energy of methanol molecules on RuP<sub>2</sub>(110) surface when energy convergence criterion are 0.02 and 0.05 (in eV/ Å).

| EDIFFG    | $E_{\text{surface}}$ | $E_{\text{adsorbate}}$ | $E_{\text{adsorbate/surface}}$ | $E_{\text{ads}}$ |
|-----------|----------------------|------------------------|--------------------------------|------------------|
| 0.02 eV/Å | -492.3153            | -30.2068               | -523.1406                      | -0.6185          |
| 0.05 eV/Å | -492.3167            | -30.2073               | -523.1413                      | -0.6173          |

## 4. Adsorption information for MD reaction intermediates on Ru(0001), Ru<sub>2</sub>P(210), RuP(112), and RuP<sub>2</sub>(110).

**Table S3.** Adsorption sites, adsorption energies (in eV), and structural parameters (in angstroms) for intermediates involved in MD on Ru(0001).

| Species                  | Sites                 | Configuration                       | $E_{\text{ads}}/\text{eV}$ | $d_{\text{C-O}}/\text{\AA}$ | $d_{\text{C-H}}/\text{\AA}$ | $d_{\text{O-H}}/\text{\AA}$ | $d_{\text{C-Ru}}/\text{\AA}$ | $d_{\text{O-Ru}}/\text{\AA}$ |
|--------------------------|-----------------------|-------------------------------------|----------------------------|-----------------------------|-----------------------------|-----------------------------|------------------------------|------------------------------|
| $\text{CH}_3\text{OH}^*$ | Ru-top                | $\eta^1(\text{O})$                  | -0.482                     | 1.450                       | 1.100                       | 0.980                       |                              | 2.306                        |
| $\text{CH}_2\text{OH}^*$ | $\text{Ru}_2$ -bridge | $\eta^1(\text{C})-\eta^1(\text{O})$ | -1.857                     | 1.476                       | 1.100                       | 0.981                       | 2.145                        | 2.271                        |
| $\text{CH}_3\text{O}^*$  | $\text{Ru}_3$ -fcc    | $\eta^3(\text{O})$                  | -2.666                     | 1.437                       | 1.100                       |                             |                              | 2.166,<br>2.202,<br>2.254    |
| $\text{CH}_2\text{O}^*$  | $\text{Ru}_3$ -hcp    | $\eta^1(\text{C})-\eta^2(\text{O})$ | -1.020                     | 1.414                       | 1.104                       |                             | 2.146                        | 2.167,<br>2.192              |
| $\text{CHOH}^*$          | $\text{Ru}_3$ -hcp    | $\eta^2(\text{C})-\eta^1(\text{O})$ | -3.054                     | 1.469                       | 1.102                       | 0.983                       | 2.104,<br>2.085              | 2.273                        |
| $\text{CHO}^*$           | $\text{Ru}_2$ -bridge | $\eta^2(\text{O})$                  | -2.420                     | 1.269                       | 1.113                       |                             | 2.010                        | 2.196                        |
| $\text{COH}^*$           | $\text{Ru}_3$ -fcc    | $\eta^3(\text{O})$                  | -4.299                     | 1.349                       |                             | 0.981                       | 2.094,<br>2.045,<br>2.030    |                              |
| $\text{CO}^*$            | Ru-top                | $\eta^1(\text{C})$                  | -1.771                     | 1.167                       |                             |                             | 1.902                        |                              |

**Table S4.** Adsorption sites, adsorption energies (in eV), and structural parameters (in angstroms) for intermediates involved in MD on  $\text{Ru}_2\text{P}(210)$ .

| Species                  | Sites                 | Configuration                       | $E_{\text{ads}}/\text{eV}$ | $d_{\text{C-O}}/\text{\AA}$ | $d_{\text{C-H}}/\text{\AA}$ | $d_{\text{O-H}}/\text{\AA}$ | $d_{\text{C-Ru}}/\text{\AA}$ | $d_{\text{O-Ru}}/\text{\AA}$ |
|--------------------------|-----------------------|-------------------------------------|----------------------------|-----------------------------|-----------------------------|-----------------------------|------------------------------|------------------------------|
| $\text{CH}_3\text{OH}^*$ | Ru-top                | $\eta^1(\text{O})$                  | -0.634                     | 1.445                       | 1.100                       | 0.978                       |                              | 2.309                        |
| $\text{CH}_2\text{OH}^*$ | $\text{Ru}_2$ -bridge | $\eta^1(\text{C})-\eta^1(\text{O})$ | -1.884                     | 1.466                       | 1.101,<br>1.099             | 0.981                       | 2.135                        | 2.242                        |
| $\text{CH}_3\text{O}^*$  | Ru-top                | $\eta^1(\text{O})$                  | -2.403                     | 1.407                       | 1.109,<br>1.107,<br>1.104   |                             |                              | 1.954                        |
| $\text{CH}_2\text{O}^*$  | $\text{Ru}_2$ -bridge | $\eta^1(\text{C})-\eta^1(\text{O})$ | -0.793                     | 1.368                       | 1.102                       |                             | 2.254                        | 1.967                        |
| $\text{CHOH}^*$          | Ru-top                | $\eta^1(\text{C})$                  | -2.376                     | 1.335                       | 1.106                       | 0.994                       | 1.932                        |                              |

|             |                         |                                     |        |       |       |       |       |       |
|-------------|-------------------------|-------------------------------------|--------|-------|-------|-------|-------|-------|
| <b>CHO*</b> | Ru <sub>2</sub> -bridge | $\eta^1(\text{C})-\eta^1(\text{O})$ | -2.386 | 1.283 | 1.110 |       | 2.062 | 2.098 |
| <b>COH*</b> | Ru-top                  | $\eta^1(\text{O})$                  | -3.986 | 1.294 |       | 0.985 | 1.762 |       |
| <b>CO*</b>  | Ru-top                  | $\eta^1(\text{O})$                  | -1.784 | 1.171 |       |       | 1.868 |       |

**Table S5.** Adsorption sites, adsorption energies (in eV), and structural parameters (in angstroms) for intermediates involved in MD on RuP(112).

| Species                  | Sites                   | Configuration                       | $E_{\text{ads}}/\text{eV}$ | $d_{\text{C-O}}/\text{\AA}$ | $d_{\text{C-H}}/\text{\AA}$ | $d_{\text{O-H}}/\text{\AA}$ | $d_{\text{C-Ru}}/\text{\AA}$ | $d_{\text{O-Ru}}/\text{\AA}$ |
|--------------------------|-------------------------|-------------------------------------|----------------------------|-----------------------------|-----------------------------|-----------------------------|------------------------------|------------------------------|
| <b>CH<sub>3</sub>OH*</b> | Ru-top                  | $\eta^1(\text{O})$                  | -0.673                     | 1.445                       | 1.100                       | 0.980                       |                              | 2.225                        |
| <b>CH<sub>2</sub>OH*</b> | Ru-top                  | $\eta^1(\text{C})$                  | -2.352                     | 1.423                       | 1.095,<br>1.093             | 0.988                       | 2.084                        |                              |
| <b>CH<sub>3</sub>O*</b>  | Ru-top                  | $\eta^1(\text{O})$                  | -2.533                     | 1.407                       | 1.106,<br>1.105,<br>1.104   |                             |                              | 1.928                        |
| <b>CH<sub>2</sub>O*</b>  | Ru-bridge               | $\eta^1(\text{C})-\eta^1(\text{O})$ | -0.990                     | 1.331                       | 1.108,<br>1.102             |                             | 2.124                        | 2.040                        |
| <b>CHOH*</b>             | Ru <sub>2</sub> -bridge | $\eta^2(\text{C})$                  | -2.848                     | 1.361                       | 1.112                       | 0.994                       | 2.086,<br>2.054              |                              |
| <b>CHO*</b>              | Ru <sub>2</sub> -bridge | $\eta^1(\text{C})-\eta^1(\text{O})$ | -2.913                     | 1.287                       | 1.110                       |                             | 2.107,<br>2.050              |                              |
| <b>COH*</b>              | Ru <sub>2</sub> -bridge | $\eta^2(\text{C})$                  | -3.878                     | 1.322                       |                             | 0.982                       | 1.967,<br>1.917              |                              |
| <b>CO*</b>               | Ru <sub>2</sub> -bridge | $\eta^2(\text{O})$                  | -1.282                     | 1.193                       |                             |                             | 2.078,<br>1.992              |                              |

**Table S6.** Adsorption sites, adsorption energies (in eV), and structural parameters (in angstroms) for intermediates involved in MD on RuP<sub>2</sub>(110).

| Species                  | Sites                   | Configuration      | $E_{\text{ads}}/\text{eV}$ | $d_{\text{C-O}}/\text{\AA}$ | $d_{\text{C-H}}/\text{\AA}$ | $d_{\text{O-H}}/\text{\AA}$ | $d_{\text{C-Ru}}/\text{\AA}$ | $d_{\text{O-Ru}}/\text{\AA}$ |
|--------------------------|-------------------------|--------------------|----------------------------|-----------------------------|-----------------------------|-----------------------------|------------------------------|------------------------------|
| <b>CH<sub>3</sub>OH*</b> | Ru-top                  | $\eta^1(\text{O})$ | -0.617                     | 1.451                       | 1.100                       | 0.992                       |                              | 2.290                        |
| <b>CH<sub>3</sub>O*</b>  | Ru <sub>2</sub> -bridge | $\eta^2(\text{O})$ | -2.814                     | 1.427                       | 1.104,<br>1.103,<br>1.102   |                             |                              | 2.168,<br>2.180              |

|                          |                       |                                     |        |       |                 |       |                 |
|--------------------------|-----------------------|-------------------------------------|--------|-------|-----------------|-------|-----------------|
| $\text{CH}_2\text{OH}^*$ | Ru-top                | $\eta^1(\text{O})$                  | -0.479 | 1.372 | 1.085,<br>1.084 | 0.997 | 2.354           |
| $\text{CH}_2\text{O}^*$  | $\text{Ru}_2$ -bridge | $\eta^2(\text{O})$                  | -1.027 | 1.247 | 1.103,<br>1.102 |       | 2.284,<br>2.340 |
| $\text{CHO}^*$           | $\text{Ru}_2$ -bridge | $\eta^1(\text{C})-\eta^1(\text{O})$ | -2.100 | 1.265 | 1.116           | 2.046 | 2.228           |
| $\text{CO}^*$            | Ru-top                | $\eta^1(\text{C})$                  | -1.248 | 1.162 |                 | 1.925 |                 |

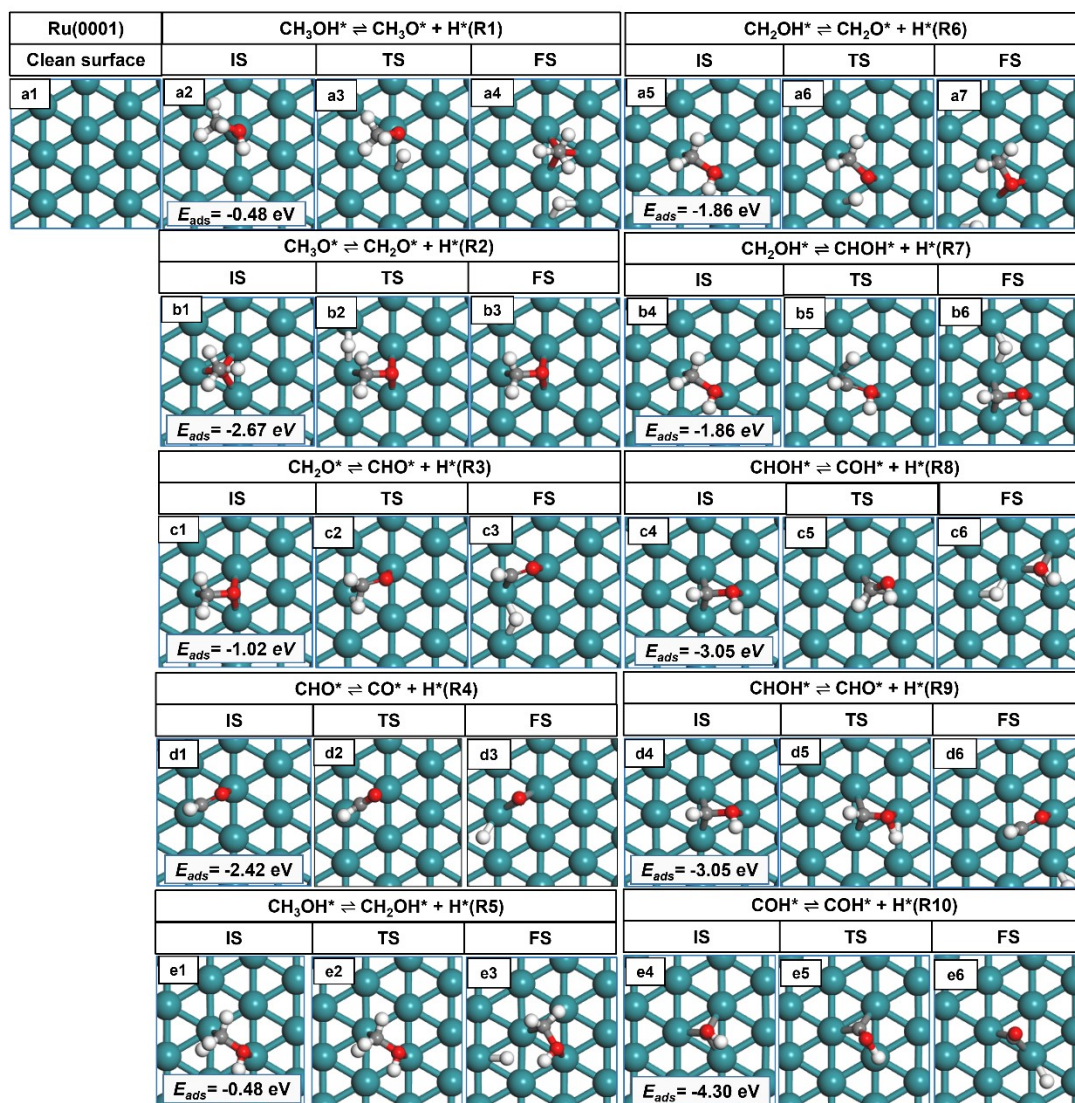

**Figure S3.** Top view of all the initial states (IS), the corresponding transition states (TS) and final states (FS) of on the Ru(0001) surfaces, along with the adsorption energies ( $E_{\text{ads}}$ ). H: white; C: grey; O: red; Ru: cyan.



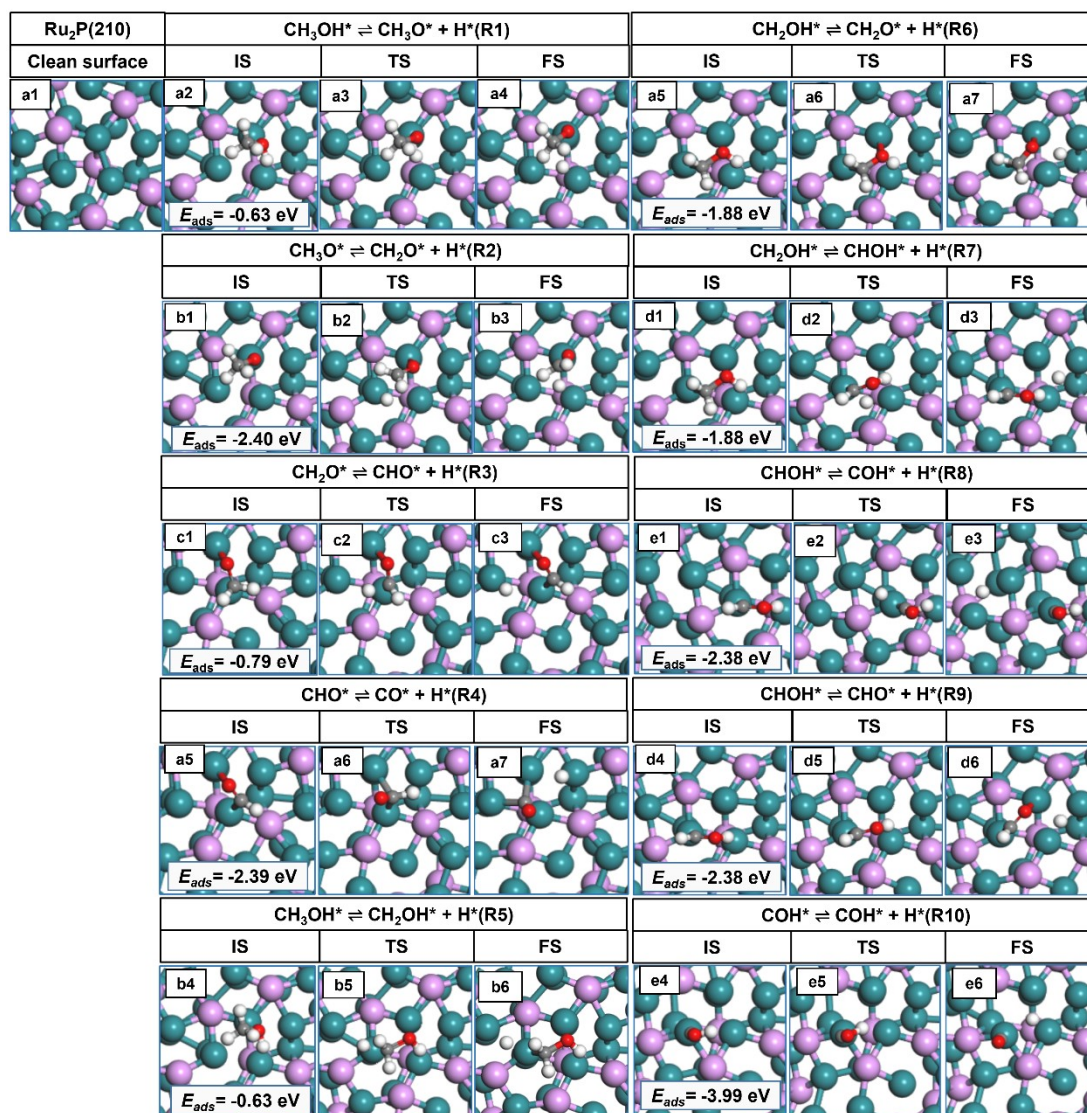

**Figure S4.** Top view of all the initial states (IS), the corresponding transition states (TS) and final states (FS) on the Ru<sub>2</sub>P(210) surfaces, along with the adsorption energies ( $E_{ads}$ ). H: white; C: grey; O: red; P: purple; Ru: cyan.



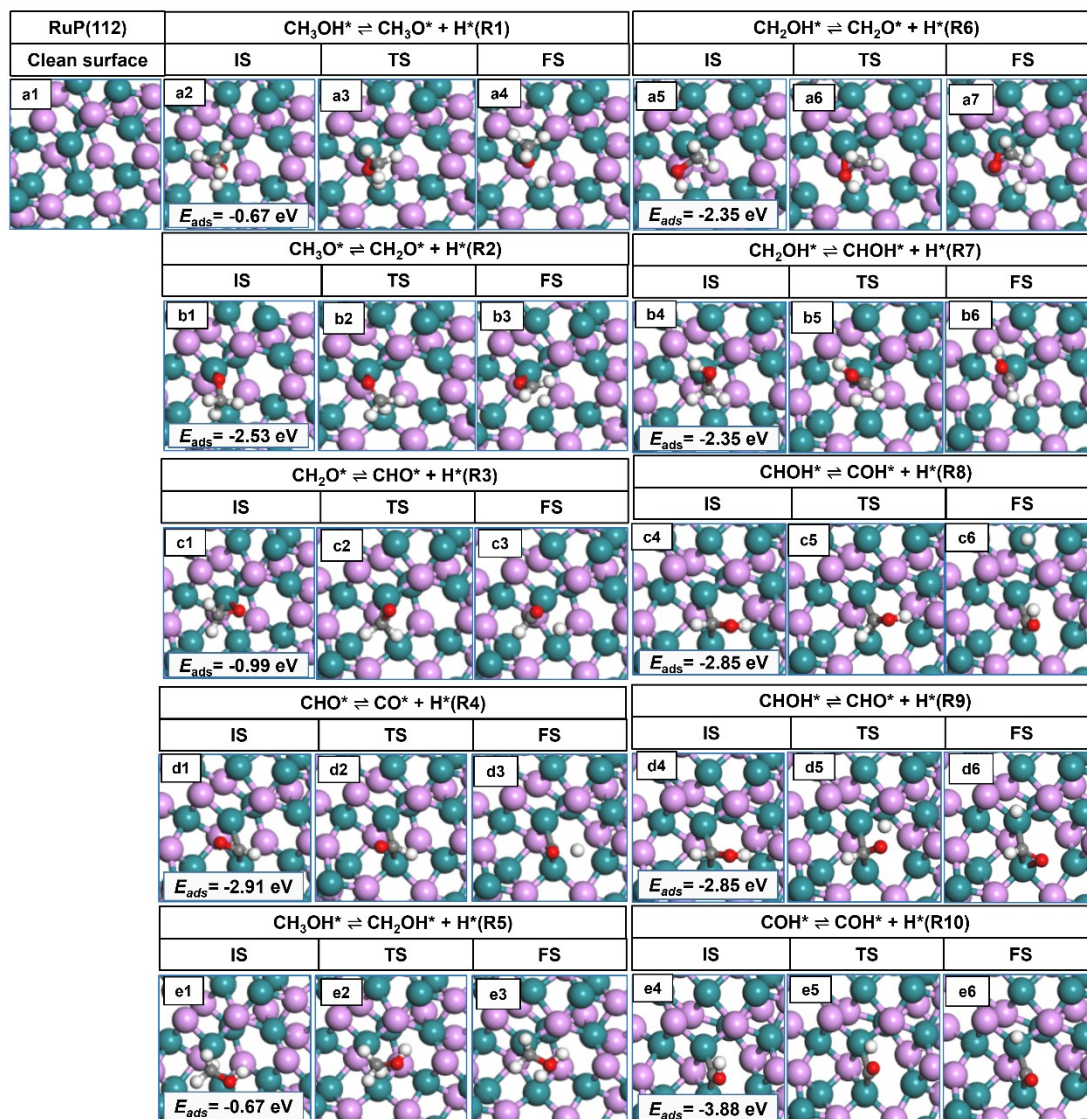

**Figure S5.** Top view of all the initial states (IS), the corresponding transition states (TS) and final states (FS) on the RuP(112) surfaces, along with the adsorption energies ( $E_{\text{ads}}$ ). H: white; C: grey; O: red; P: purple; Ru: cyan.

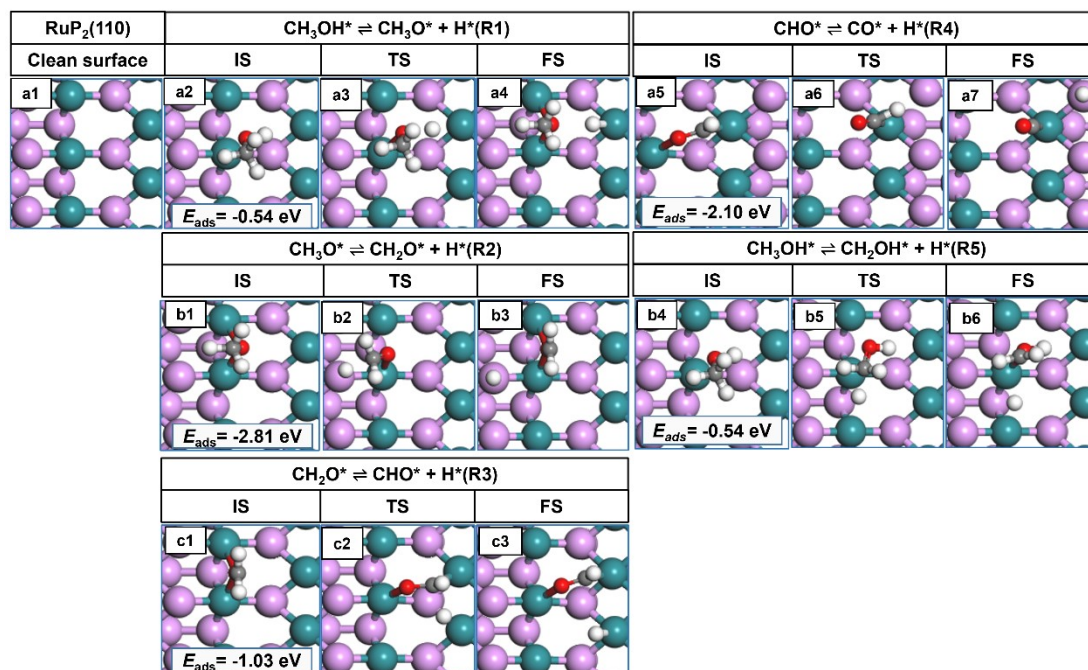

**Figure S6.** Top view of all the initial states (IS), the corresponding transition states (TS) and final states (FS) on the RuP<sub>2</sub>(110) surfaces, along with the adsorption energies ( $E_{\text{ads}}$ ). H: white; C: grey; O: red; P: purple; Ru: cyan.

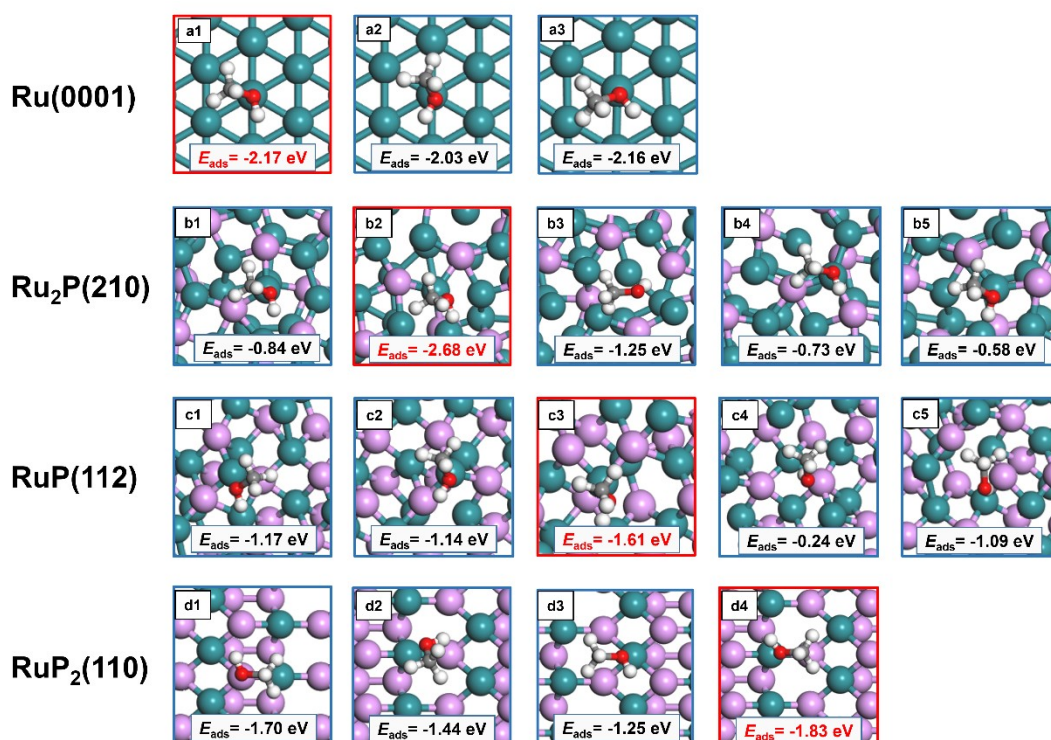

**Figure S7.** Screening of methanol adsorption sites on Ru(0001), Ru<sub>2</sub>P(210), RuP(112), and RuP<sub>2</sub>(110) surfaces (To save computing resources, the K-point of  $1 \times 1 \times 1$  is used for adsorption site screening). H: white; C: grey; O: red; P: purple; Ru: cyan.

cyan.

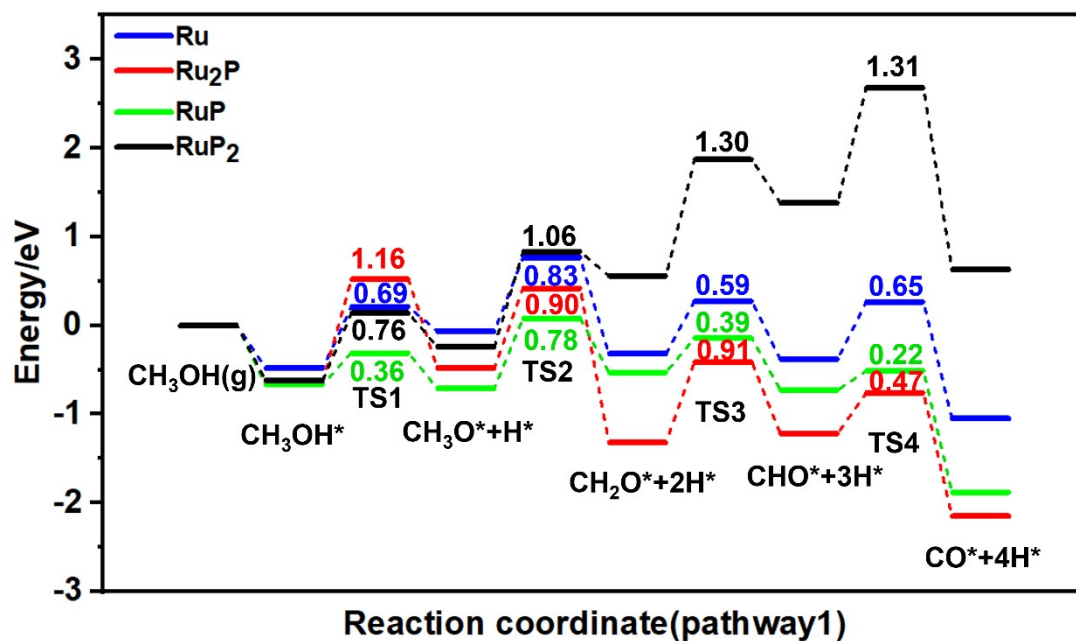

Figure S8. Reaction energy barriers for pathway 1 on the Ru<sub>x</sub>P<sub>y</sub> surfaces.

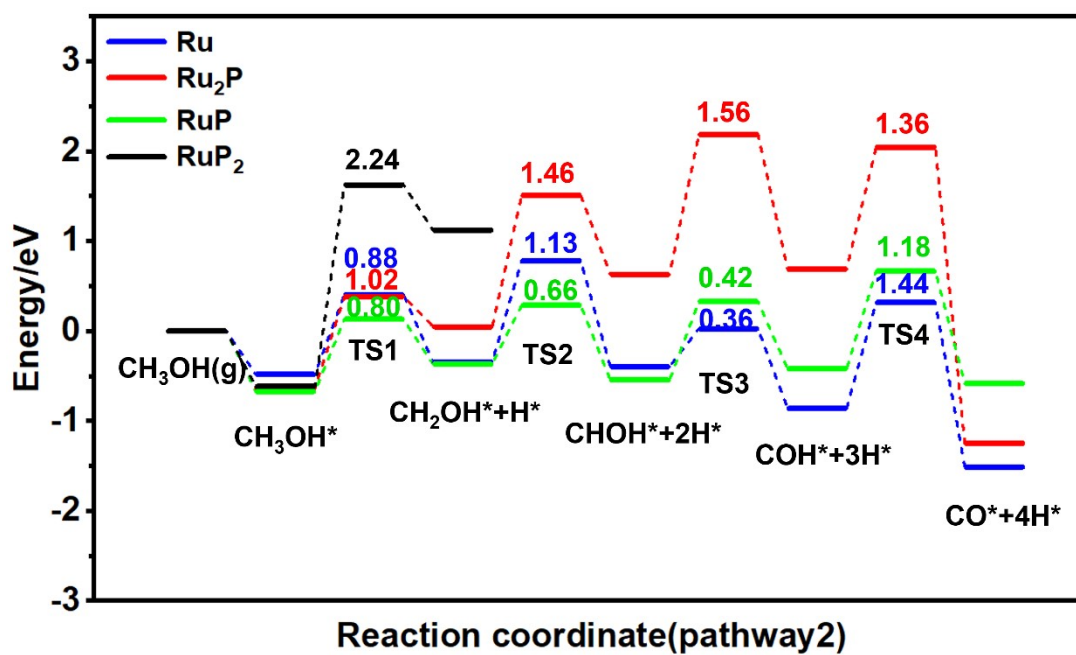

Figure S9. Reaction energy barriers for pathway 2 on the Ru<sub>x</sub>P<sub>y</sub> surfaces.



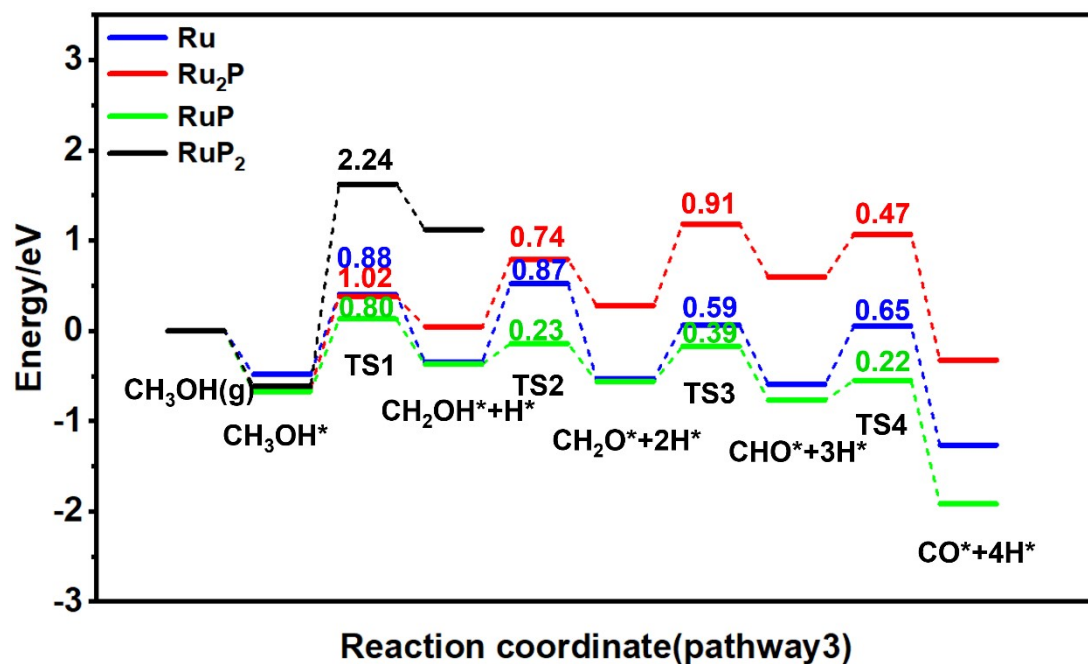

Figure S10. Reaction energy barriers for pathway 3 on the  $Ru_xP_y$  surfaces.

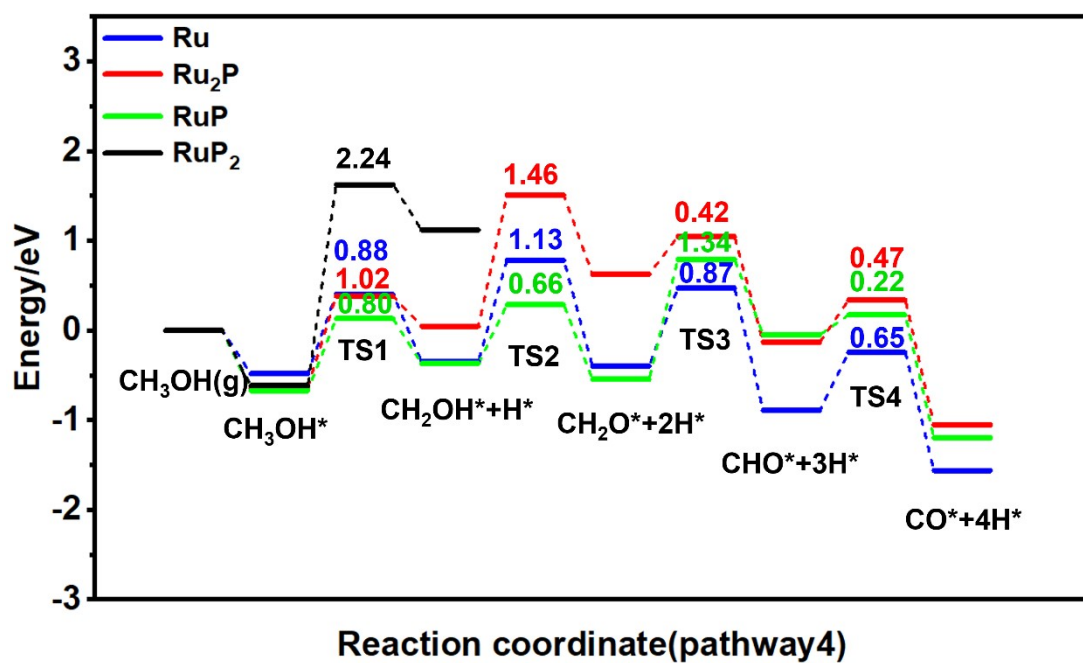

Figure S11. Reaction energy barriers for pathway 4 on the  $Ru_xP_y$  surfaces.

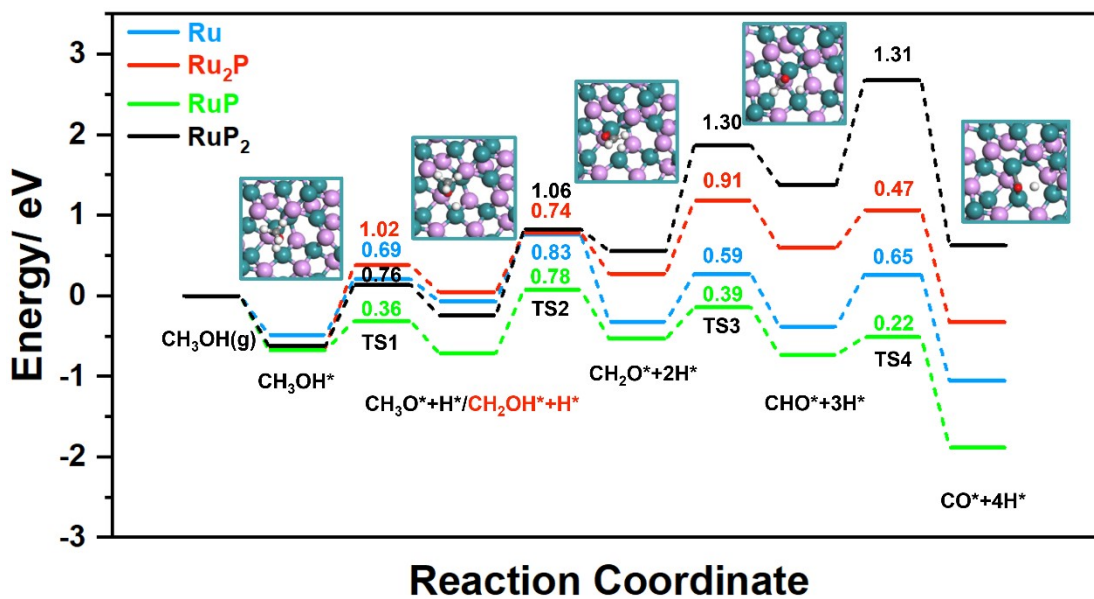

Figure S12. Optimal pathways for methanol dehydrogenation on Ru(0001) (pathway1), Ru<sub>2</sub>P(210) (pathway3), RuP(112) (pathway1), and RuP<sub>2</sub>(110) (pathway1) surfaces, respectively.

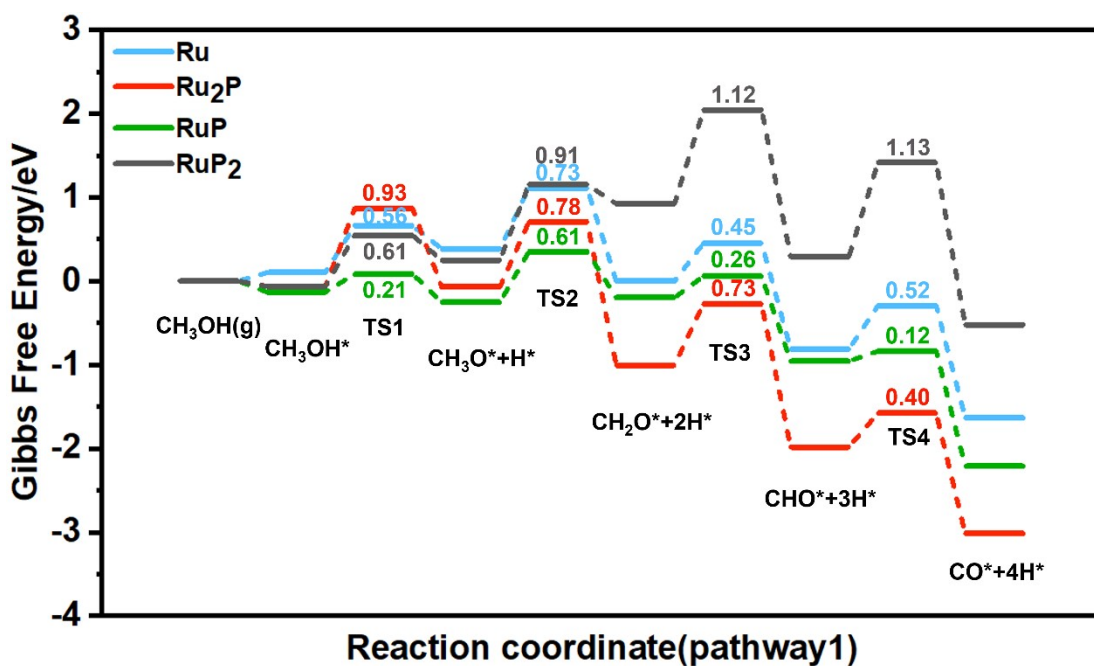

Figure S13. Reaction free energy barriers for pathway 1 on the Ru<sub>x</sub>P<sub>y</sub> surfaces.

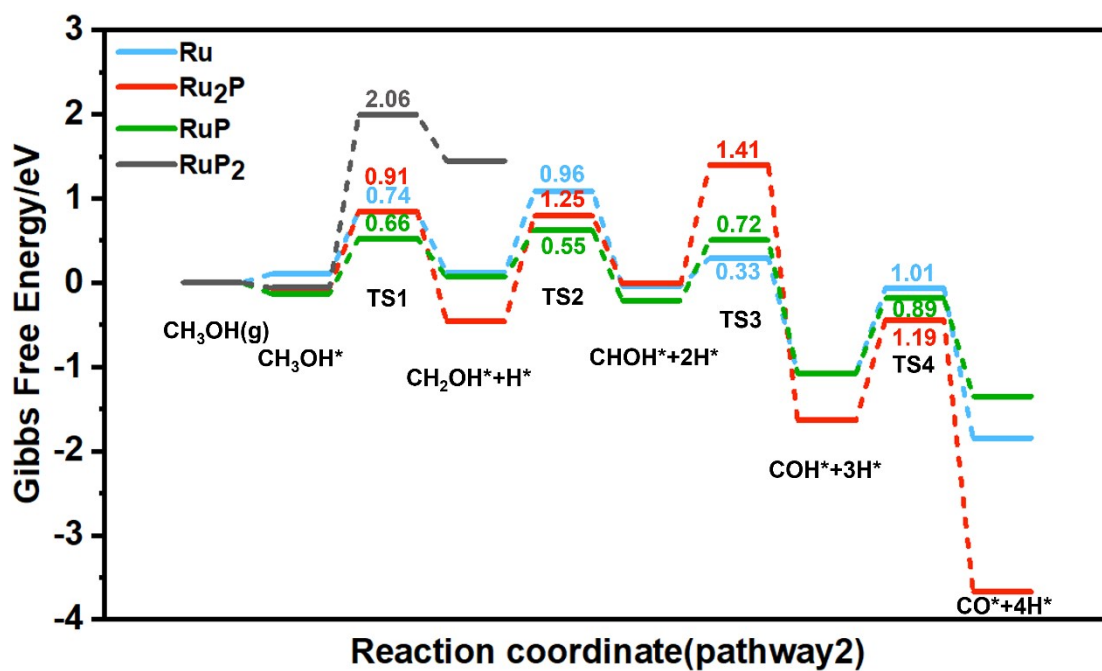

Figure S14. Reaction free energy barriers for pathway 2 on the  $Ru_xP_y$  surfaces.

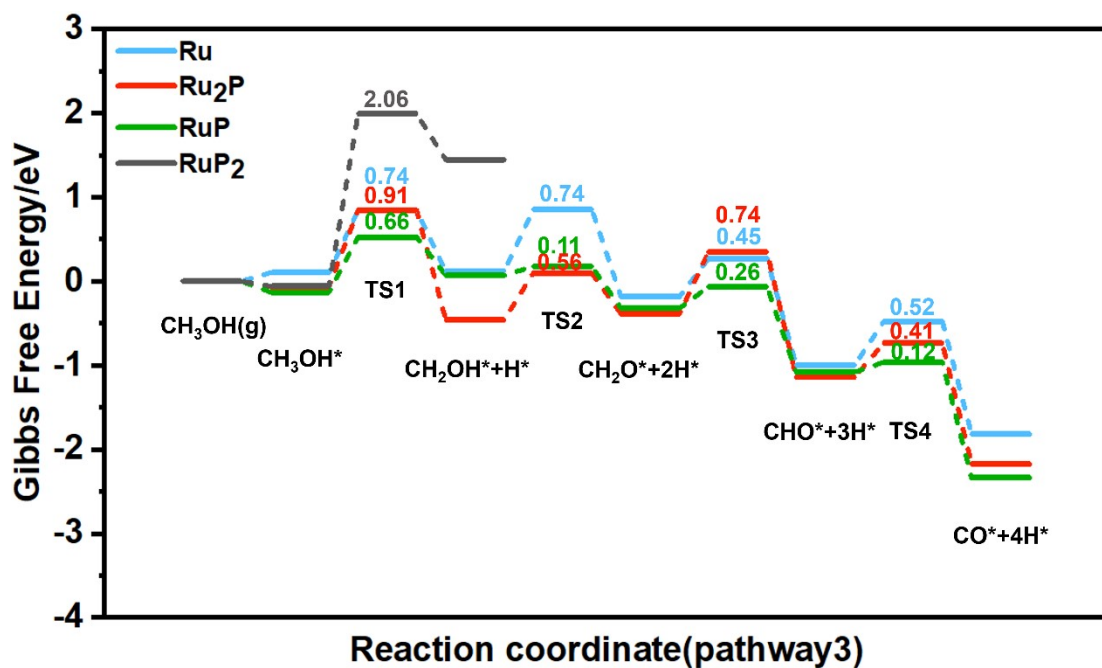

Figure S15. Reaction free energy barriers for pathway 3 on the  $Ru_xP_y$  surfaces.



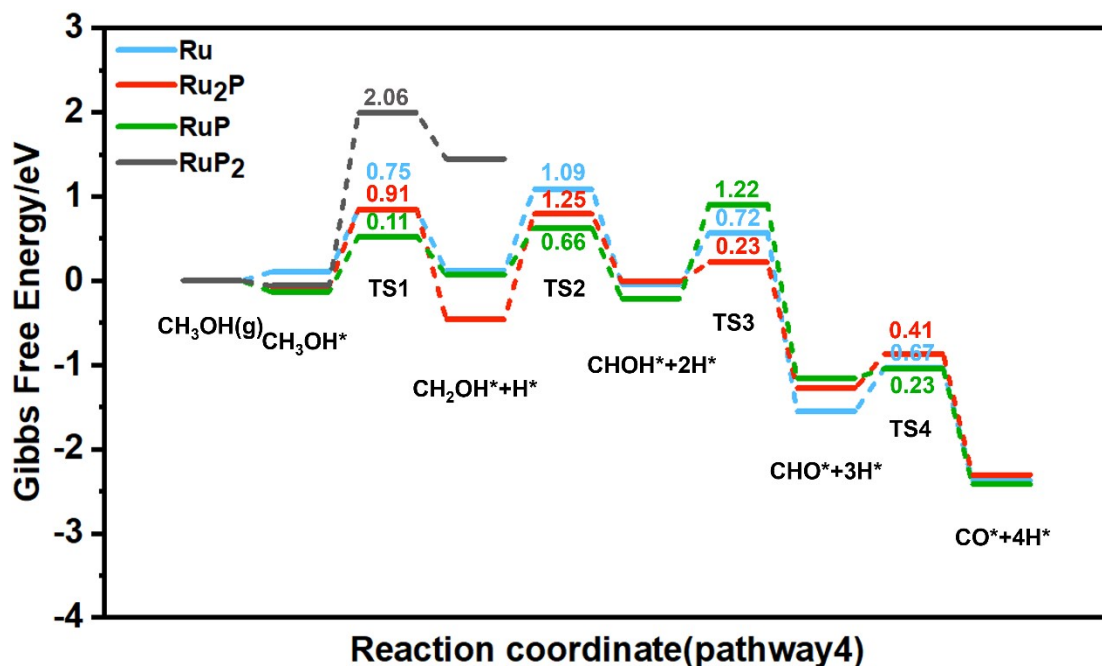

**Figure S16.** Reaction free energy barriers for pathway 4 on the  $\text{Ru}_x\text{P}_y$  surfaces.

**Table S7.** The states of TDTS and TDI, the energies of TDTS and TDI, and the calculated  $E_a^{\text{eff}}$  of MD over the surfaces of Ru(0001),  $\text{Ru}_2\text{P}$ (210), RuP(112), and  $\text{RuP}_2$ (110).

|                         | Ru(0001)                 | $\text{Ru}_2\text{P}$ (210) | RuP(112)                   | $\text{RuP}_2$ (110)     |
|-------------------------|--------------------------|-----------------------------|----------------------------|--------------------------|
| TDTS                    | TS4                      | TS3                         | TS2                        | TS4                      |
| $E_{\text{TDTS}}$ (eV)  | 0.76                     | 1.19                        | 0.08                       | 2.68                     |
| TDI                     | $\text{CH}_3\text{OH}^*$ | $\text{CH}_3\text{OH}^*$    | $\text{CHO}^*+3\text{H}^*$ | $\text{CH}_3\text{OH}^*$ |
| $E_{\text{TDI}}$ (eV)   | -0.48                    | -0.63                       | -0.70                      | -0.62                    |
| $\Delta E$              | 0                        | 0                           | 0                          | 0                        |
| $E_a^{\text{eff}}$ (eV) | 1.24                     | 1.82                        | 0.78                       | 3.30                     |

**Table S8.** Comparison of previous DFT calculations works on the mechanism of MD reaction over metal-based catalysts (without support).

| Catalyst             | Calculation software | Advantage Path                                                                                                                             | RDS energy barrier (electronic energies) | Reference    |
|----------------------|----------------------|--------------------------------------------------------------------------------------------------------------------------------------------|------------------------------------------|--------------|
| RuP(112)<br>Ru(0001) | VASP                 | $\text{CH}_3\text{OH} \rightarrow \text{CH}_3\text{O} \rightarrow \text{CH}_2\text{O}$<br>$\rightarrow \text{CHO} \rightarrow \text{CO}$ , | 0.78 eV,<br>0.83 eV                      | In this work |

---

|                                 |                   |                                                                                                                                                                           |                                 |    |
|---------------------------------|-------------------|---------------------------------------------------------------------------------------------------------------------------------------------------------------------------|---------------------------------|----|
|                                 |                   | CH <sub>3</sub> OH→CH <sub>3</sub> O→CH <sub>2</sub> O<br>→CHO→CO                                                                                                         |                                 |    |
| Ru(0001)                        | DMol <sup>3</sup> | CH <sub>3</sub> OH→CH <sub>3</sub> O→CH <sub>2</sub> O<br>→CHO→CO                                                                                                         | 1.01 eV                         | 29 |
| Pd(100)                         | CASTEP            | CH <sub>3</sub> OH→CH <sub>2</sub> OH→<br>CHOH→CHO→CO                                                                                                                     | 1.79 eV                         | 11 |
| Rh(111)                         | DMol <sup>3</sup> | CH <sub>3</sub> OH→CH <sub>3</sub> O→CH <sub>2</sub> O<br>→CHO→CO and<br>CH <sub>3</sub> OH→CH <sub>2</sub> OH→<br>CHOH→CHO→CO                                            | 0.72 eV                         | 14 |
| Pd(111),<br>Pt(111),<br>Ni(111) | VASP              | CH <sub>3</sub> OH→CH <sub>2</sub> OH→<br>CHOH→CHO→CO,<br>CH <sub>3</sub> OH→CH <sub>2</sub> OH→<br>CHOH→CHO→CO,<br>CH <sub>3</sub> OH→CH <sub>2</sub> OH→<br>CHOH→CHO→CO | 0.66 eV,<br>0.62 eV,<br>0.74 eV | 15 |
| PdAu(100)                       | DMol <sup>3</sup> | CH <sub>3</sub> OH→CH <sub>3</sub> O→CH <sub>2</sub> O<br>→CHO→CO                                                                                                         | 1.41 eV                         | 26 |
| PtRu/Pt(111)                    | DMol <sup>3</sup> | CH <sub>3</sub> OH→CH <sub>3</sub> O→CH <sub>2</sub> O<br>→CHO→CO                                                                                                         | 1.10 eV                         | 27 |

---
